# Supplementary material for: A Streptococcus suis Strain Δcps/ssna-msly (P353L)-SC19 Provides Cross-Protection against Serotypes 2 and 9 Strain Challenges in a Mouse Model
Source: MDPI journal article supplement (doi:10.3390/vaccines12030283), 2024-03-08
Supplement: s1 [file s1]

**Table S1.** Primers used for the construction of  $\Delta cps/ssna-msly$  (P353L)-SC19.

| Primer          | Sequence                                         | Function                                                                                                                                                | Target sequence                  |
|-----------------|--------------------------------------------------|---------------------------------------------------------------------------------------------------------------------------------------------------------|----------------------------------|
| ECORI-E-1       | AAAGAATTCGGCTCGTGCTATATTCTCTTG<br>G              | Amplification of left arm<br>sequence of <i>cpsEF</i> gene for<br>construction of the isogenic<br>mutant with thermosensitive<br>suicide vector pSET4S  | 481 bp                           |
| RONGHE-<br>EF-2 | GAATCTTTTTCATAACAGCTCCTCCACTATT<br>TC            |                                                                                                                                                         |                                  |
| RONGHE-<br>EF-1 | GAAATAGTGGAGGAGCTGTTATGAAAAAG<br>ATTC            | Amplification of right arm<br>sequence of <i>cpsEF</i> gene for<br>construction of the isogenic<br>mutant with thermosensitive<br>suicide vector pSET4S | 495 bp                           |
| BAMHI-F-2       | AAAGAATCCGTTTGCCACAGCCTGTG                       |                                                                                                                                                         |                                  |
| DSsnA-LF1       | GGCGAATTCTGTTTCGCATCAGTCGTAG                     | Amplification of left arm<br>sequence of <i>ssna</i> gene for<br>construction of the isogenic<br>mutant with thermosensitive<br>suicide vector pSET4S   | 650 bp                           |
| DSsnA-LR1       | GAACCAGGGCGTATCTCTTCATATAAAACT<br>CCTTTTGTAT     |                                                                                                                                                         |                                  |
| Dssna-RL1       | GAAAGATCGCCGTGTAATCATTCTTTTGAGC<br>TTGAAAGCATGAC | Amplification of right arm<br>sequence of <i>ssna</i> gene for<br>construction of the isogenic<br>mutant with thermosensitive<br>suicide vector pSET4S  | 658 bp                           |
| Dssna-RR1       | CGAGGATCCCAATTTCAACCTCGGTCGCTC                   |                                                                                                                                                         |                                  |
| SSNA-jd-1       | GTTTTAAGTTGTTGAGCTGAAACAGTC                      | Primers for PCR identification<br>of <i>ssna</i> mutant and sequencing                                                                                  | 3303 bp (mutant)<br>4587 bp (WT) |
| SSNA-jd-2       | GTCGCCATAAATGGCGGATAG                            |                                                                                                                                                         |                                  |
| CPSEF-F         | GTTTATCCTGAAATACGATTGTGC                         | Primers for PCR identification<br>of <i>cpsEF</i> mutant and<br>sequencing                                                                              | 1891 bp (mutant)<br>3689 bp (WT) |
| CPSEF-R         | TAATACACTTTATTATCTACCCCATG                       |                                                                                                                                                         |                                  |
| SLY-ATG-F       | ATGAGAAAAAGTTCGCACTTGATTT                        | Primers for <i>sly</i> amplification and<br>sequencing                                                                                                  | 1491 bp                          |
| SLY-<br>wuTAA-R | CTCTATCACCTCATCCGCATACTGT                        |                                                                                                                                                         |                                  |

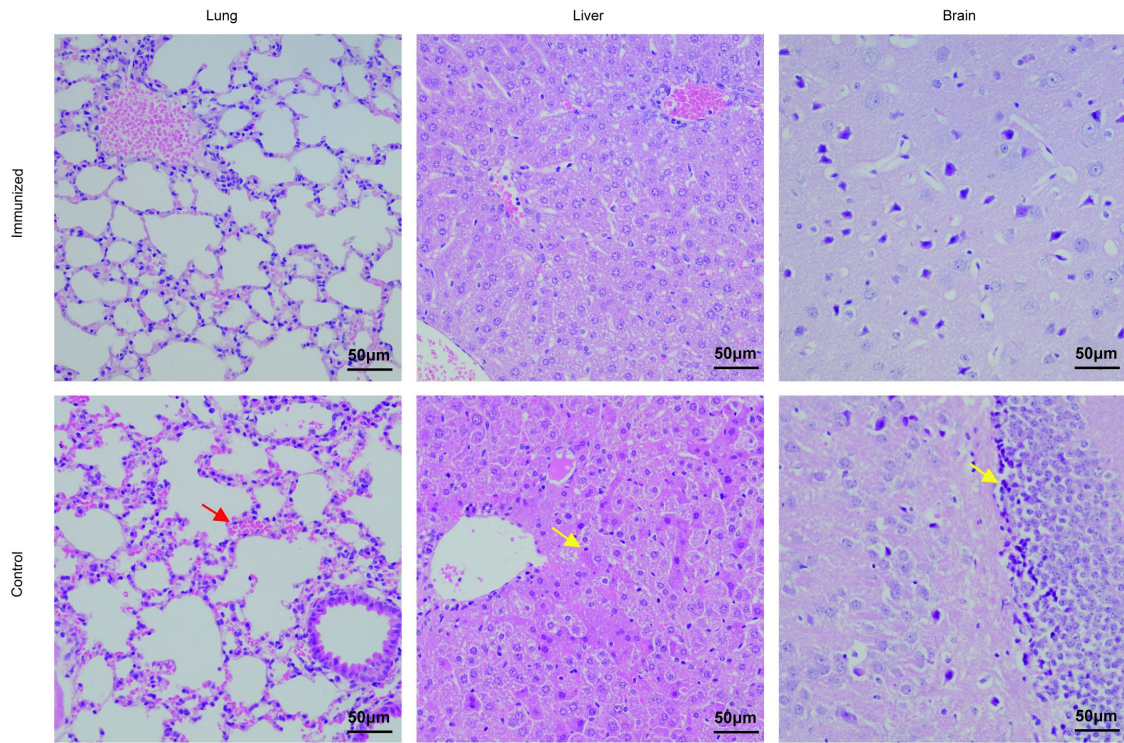

**Supplementary Figure 1.** H&E staining performed on tissue samples from mice infected with SS9 strain at 24 h post-infection. Congestion in the lung and liver was indicated by a “red arrow”, while cell degeneration and necrosis were indicated by a “yellow arrow”.

A

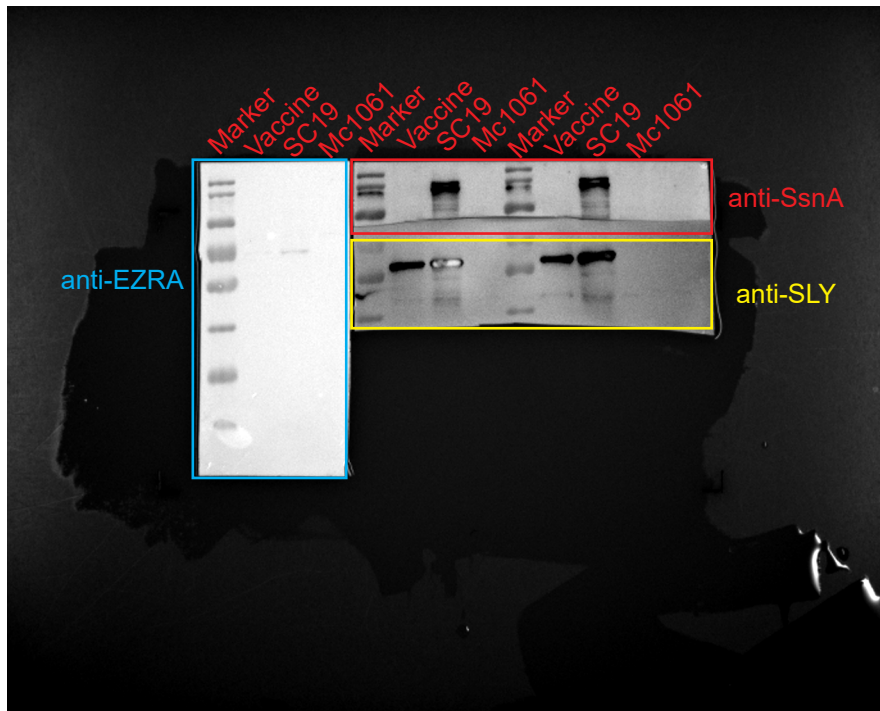

B

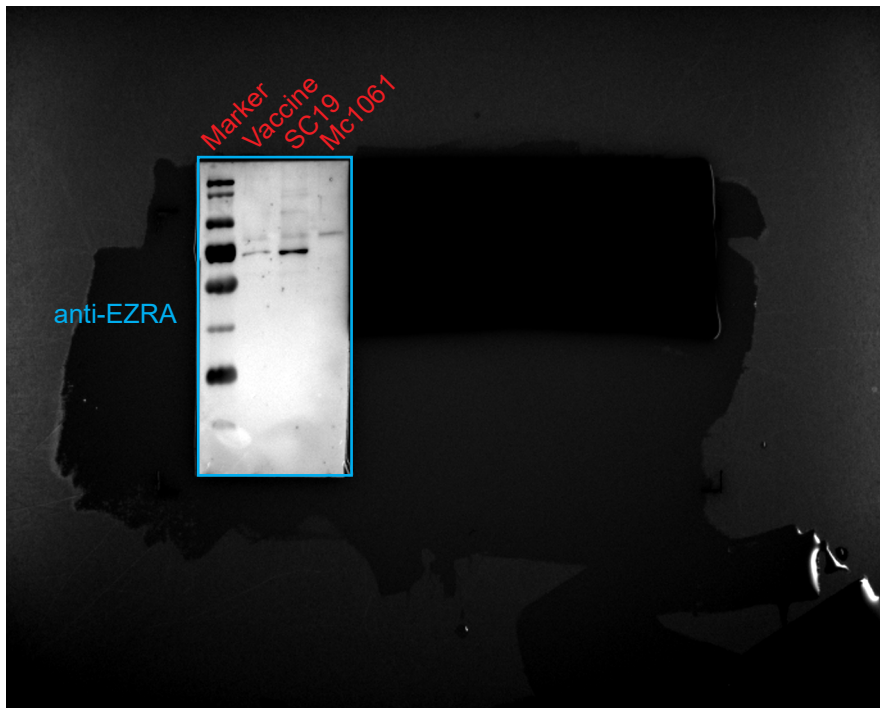

**Fig1C. original blot figure**

(A):The expression of SsnA and SLY was detected by western blot, while EZRA served as a loading control, Mc1061 served as a negative control. The exposure time is 10 seconds.(B):The expression of EZRA.The exposure time is 20 seconds.
